# Supplementary material for: Transcriptional alteration of genes linked to gastritis concerning Helicobacter pylori infection status and its virulence factors
Source: Research Square preprint supplement (doi:10.21203/rs.3.rs-484619/v1), 2021-05-14
Supplement: Supplementary file 1 [file 675c8fb1a986fc84ef051cc1.docx]

**Supplementary Table 1**

**Transcriptional alteration of genes linked to gastritis concerning *Helicobacter pylori* infection status and its virulence factors**

**Table 1.** Demographic, pathological, and genotypic characteristics of chronic moderate gastritis patients infected and non-infected with *H. pylori*

| **Groups** | **Gender** | **Age** | **Nationality** | **Ethnicity** | **Smoking** | **Alcoholism** | **Endoscopic finding** | **Erosion** | **Active** | **Genotype** | **Patient ID** |
| --- | --- | --- | --- | --- | --- | --- | --- | --- | --- | --- | --- |
| **DU GU C** |
| **Moderate chronic gastritis/ H. pylori positive**  **N=12** | Male: 4 (33.3%) | mean age 42.25 years, range 22_65 years | Iranian:12 (100%) | Fars: 8 (66.7)  Kurd: 3 (25%)  Lour: 1 (8.3%) | Yes: 0  No: 12 (100%) | Yes: 1 (8.3%)  No: 11 (91.7%) | 0 0 0 | 6 | 9 | **A:** *Cag A+/Cag Y+/Cag L+/ Vac A m1s1/ice A1+* | 129, 155, 160 |
| Female: 8 (66.7%) | **B:** *Cag A+/Cag Y+/Cag L+/ Vac A m2s1/ice A1+* | 133, 146, 152 |
| **C:** *Cag A-/ Cag Y-/ Cag L-/ Vac A m2s2/ice A1+/A2+* | 88, 132, 90 |
| **D:** *Cag A+/ Cag Y+/Cag L+/ Vac A m2s1/ice A-* | 67 |
| **E:** *Cag A+/Cag Y+/Cag L+/ Vac A m2s1/ice A1+/A2+* | 69 |
| **F:** *Cag A-/Cag Y+/Cag L+/ Vac A m2s2/ice A1+* | 145 |
| **moderate chronic gastritis/ H. pylori negative**  **N=12** | Male: 7 (58.3%) | mean age 42.25 years, range 22_65 years | Iranian: 11 (91.7%)  Afghan: 1 (8.3%) | Fars: 10 (83.3%)  Kurd: 1 (8.3%)  Lour: 1 (8.3%) | Yes: 2 (16.7%)  No: 10 (83.3%) | Yes: 2 (16.7%)  No: 10 (83.3%) | 2 0 0 | 4 | 5 |  |  |
| Female: 5 (41.7%) |
